# Supplementary material for: Temporal and vertical distributions of the occurrence of the cirrus clouds over the coastal station in the Indian monsoon region
Source: Copernicus journal article supplement (doi:10.5194/acp-2021-798), 2021-10-13
Supplement: Supplementary file 1 [file acp-2021-798-supplement.pdf]

# Temporal and vertical distributions of the occurrence of the cirrus clouds over the coastal station in the Indian monsoon region

Saleem Ali, Sanjay Kumar Mehta\* Aravindhavel A., and T.V. Ramesh Reddy  
 Atmospheric Observations and Modelling Laboratory, Research Institute, SRM Institute of Science and Technology, Kattankulathur, 603203, Tamil Nadu, India

\*Correspondence to: Sanjay Kumar Mehta (ksanjaym@gmail.com)

## Supplementary Material

Table ST1. Statistics of total hours of operation, total cirrus observation and percentage of occurrence, along with a seasonal average of CPT altitude (CPH), COH and TTL thickness (TTLt) during 2016 to 2018.

|                            | Total Obs. (h) | Cirrus Obs. (h) | PO (%) | CPH (km) | COH (km) | TTLt (km) |
|----------------------------|----------------|-----------------|--------|----------|----------|-----------|
| <b>2016</b>                |                |                 |        |          |          |           |
| DJF                        | 463            | 225             | 48.6   | 17.6     | 11.8     | 5.8       |
| MAM                        | 935            | 513             | 54.9   | 17.8     | 11.8     | 6         |
| JJA                        | 745            | 537             | 72.1   | 17       | 12.6     | 4.4       |
| SON                        | 930            | 442             | 47.5   | 17       | 12.2     | 4.8       |
| Annual                     | 3073           | 1717            | 55.9   | -        | -        | -         |
| <b>2017</b>                |                |                 |        |          |          |           |
| DJF                        | 991            | 169             | 17.1   | 17.5     | 11.6     | 5.9       |
| MAM                        | 1308           | 496             | 37.9   | 17.4     | 11.5     | 5.9       |
| JJA                        | 1079           | 576             | 53.4   | 17       | 12.4     | 4.6       |
| SON                        | 938            | 430             | 45.8   | 17.1     | 12.2     | 4.9       |
| Annual                     | 4316           | 1671            | 38.7   | -        | -        | -         |
| <b>2018</b>                |                |                 |        |          |          |           |
| DJF                        | 1271           | 324             | 25.5   | 17.5     | 11.4     | 6.1       |
| MAM                        | 1247           | 530             | 42.5   | 17.4     | 11.9     | 5.5       |
| JJA                        | 1006           | 461             | 45.8   | 16.9     | 12.3     | 4.6       |
| SON                        | 865            | 299             | 34.6   | 16.9     | 11.8     | 5.1       |
| Annual                     | 4389           | 1614            | 36.8   | -        | -        | -         |
| <b>Overall (2016-2018)</b> |                |                 |        |          |          |           |
| DJF                        | 2725           | 718             | 26.3   | 17.5     | 11.6     | 5.9       |
| MAM                        | 3490           | 1539            | 44.1   | 17.5     | 11.7     | 5.8       |
| JJA                        | 2830           | 1574            | 55.6   | 17       | 12.4     | 4.5       |
| SON                        | 2733           | 1171            | 42.8   | 17       | 12       | 4.9       |
| Annual                     | 11778          | 5002            | 42.5   | -        | -        | -         |

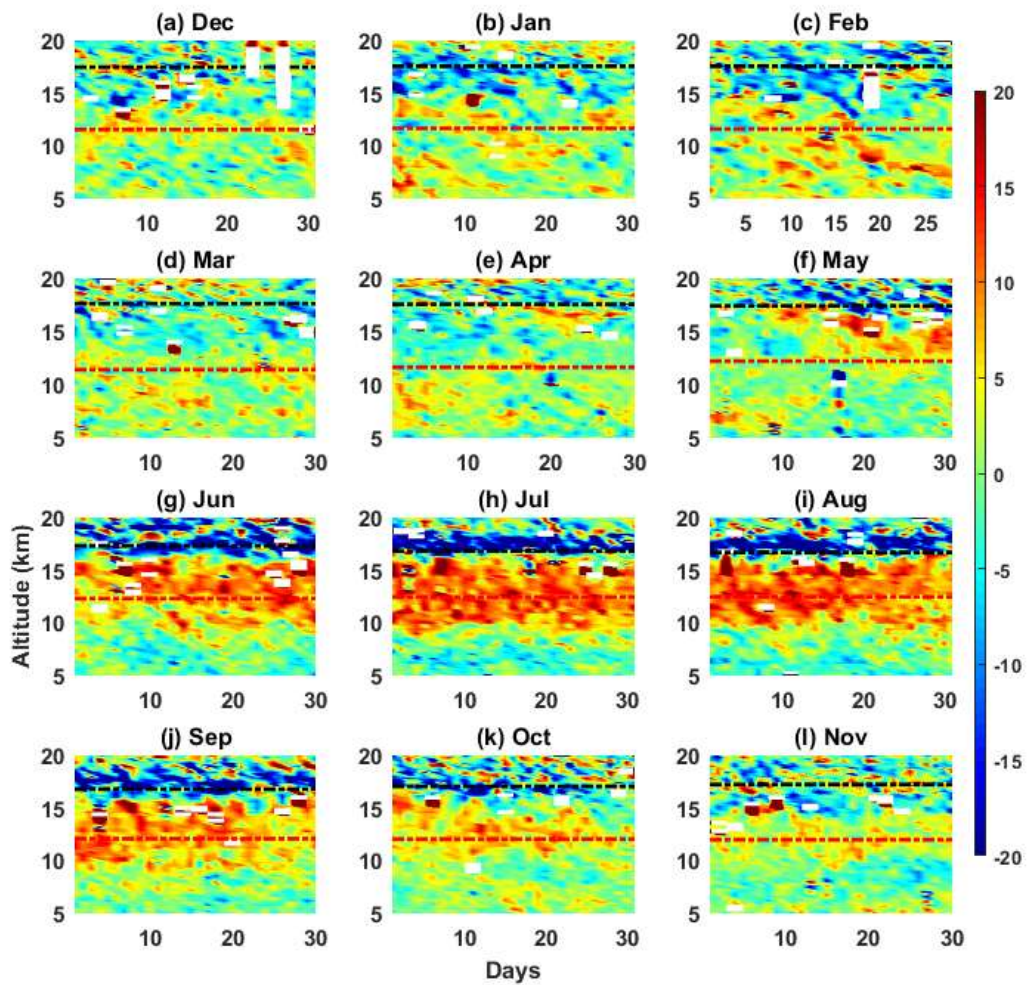

Figure S1: Time height section of the monthly variation of the zonal wind shear during 2016 to 2018 over Chennai. Monthly mean CPT altitude (black) and COH (blue) are shown as dashed lines.

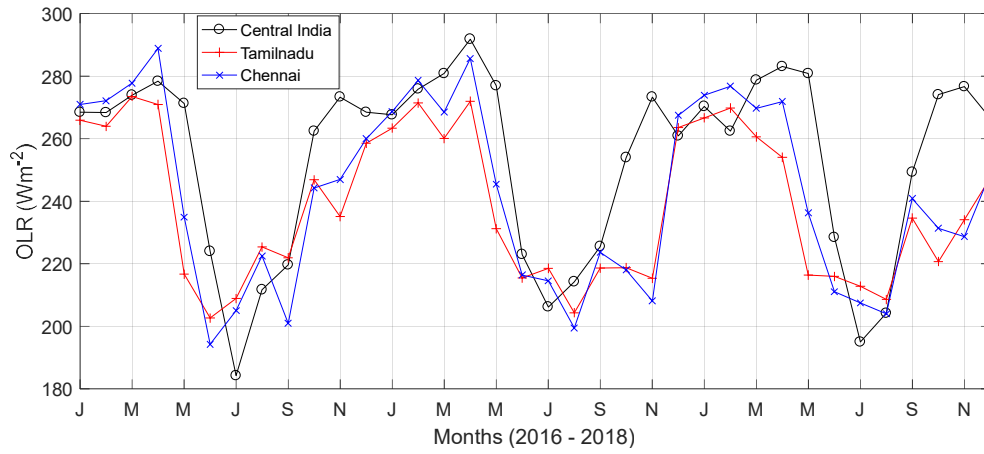

Figure S2: Monthly averaged OLR value observed across central India (Black), Tamilnadu (Red), and Chennai (blue) during 2016 to 2018.

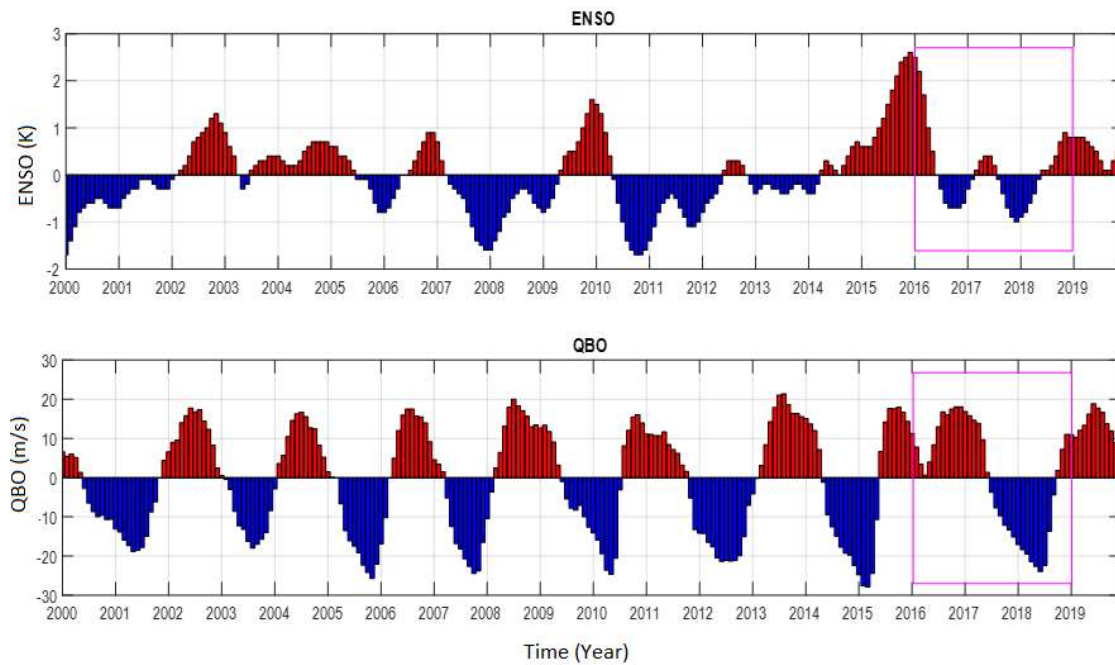

Figure S3: Time series of the El Niño Southern Oscillation (ENSO) Index and Quasi-Biennial Oscillation (QBO) to 2000-2019.
